# Supplementary material for: Bi‐allelic VPS16 variants limit HOPS/CORVET levels and cause a mucopolysaccharidosis‐like disease
Source: PubMed Central journal article supplement (PMC8103096; doi:10.15252/emmm.202013376), 2021-05-03
Supplement: EMMM-13-e13376-s003.pdf [file EMMM-13-e13376-s003.pdf]

# Bi-allelic VPS16 variants limit HOPS/CORVET levels and cause a mucopolysaccharidosis-like disease – APPENDIX

## *Table of contents*

|                                                      |        |
|------------------------------------------------------|--------|
| Extended patient description.....                    | page 2 |
| Supplementary references.....                        | page 5 |
| Appendix figure S1 (related to Fig 6C-D).....        | page 6 |
| Appendix table S1 (related to Fig 3-8, EV3-EV4)..... | page 7 |

## EXTENDED PATIENT DESCRIPTIONS

Patient A is a boy born at 34 weeks of gestation to healthy first-cousin parents of Iranian descent (Family I; Fig. 2A). He was born via acute caesarean section due to vaginal bleeding (underlying cause is unknown) with a birth weight of 2.5 kg [z-score +0.87 (Chou et al. 2020)], length of 50 cm (z +3.37), and head circumference of 33 cm (z +0.53). He was healthy and developed normally until the age of 9 months, when the first signs of psychomotor regression appeared following a viral gastroenteritis. He could sit with aid but no longer crawled, and from then on failed to attain new psychomotor skills. A first brain CT was normal. An X-ray of the hand performed at 10 months of age was interpreted as normal.

From 14 months of age, the boy displayed periodic neutropenia and progressively developed muscular hypotonia and lower limb spasticity. At the age of 1 year and 9 months he was referred for further etiological investigations. Clinical examination revealed global developmental delay corresponding to a developmental age of 6 months, central hypotonia with severe head lag during traction, lower limb dystonia, impaired neck and shoulder mobility and coarse facial features suggestive of a mucopolysaccharidosis (Fig. 1A). An MRI of the brain showed abnormal myelination and a thin corpus callosum. EEG revealed generalized encephalopathy, but no seizure activity was observed. Neurophysiological testing showed signs of demyelinating sensorymotor polyneuropathy. Cerebrospinal fluid (CSF) biomarkers were extremely high (tau protein 27400 ng/L, ref <250 ng/L; neurofilament light 8970 ng/L, ref <380 ng/L; glial fibrillary acidic protein 2950 ng/L, ref <250 ng/L; albumin 2020 ng/L, ref <225 ng/L).

Urine glycosaminoglycans, plasma amino acids, acylcarnitine profile and urine organic acids were normal. Extended screening for LSDs showed increased excretion of total sialic acid in urine (142 mmol/mol creatinine, ref 50–107 mmol/mol creatinine) and an abnormal pattern of both acidic and neutral oligosaccharides. Enzymatic assays for aspartylglucosaminidase (AGU),  $\alpha$ -N-acetylgalactosaminidase (Schindler),  $\alpha$ -fucosidase ( $\alpha$ -fucosidosis) and hexosaminidase A/B (GM<sub>2</sub>-gangliosidosis) failed to find the cause for these abnormalities. Metachromatic leukodystrophy, Krabbe, Gaucher, Wolman and Mucopolysaccharidosis II/III were also excluded by enzymatic measurements. Levels of globotriaosylsphingosine (lysoGb3) and glucosylsphingosine were normal. Chitotriosidase was slightly elevated (61 nkat/L, ref <40 nkat/L). Biochemical assays for peroxisomal diseases (pipecolic, pristanic and phytanic acids, very long chain fatty acids and plasmalogenes) were normal. Vacuolized lymphocytes in blood were increased (8%, ref <4%), and a bone marrow smear revealed densely stained granules in myelopoietic cells (Fig. 1I), suggestive of an LSD (e.g. Chediak-Higashi syndrome). An NGS-based exome panel targeting known LSD genes did not reveal any pathogenic variants. The patient was diagnosed with severe obstructive sleep apnea, due to adenoid and tonsil hypertrophy and underwent adeno- and tonsillectomy at the age of 1 year and 11 months with moderate improvement of sleep quality. The patient was perceived to have normal visual

function despite slow tracking eye movements, while fundoscopic examination revealed mild pallor of the optic discs suggestive of optic atrophy.

Follow-up MRI of brain and spinal cord at 2 years and 4 months revealed patchy white matter lesions in the periventricular and deep white matter (Fig. 1E). A decreased N-acetylaspartate (NAA) peak was seen on MR spectroscopy (Fig. 1F). Cerebellar volumes were reduced, suggesting atrophy. Spine MRI showed contrast enhancement of the nerve roots of the conus medullaris (Fig. 1H). MRI of the abdomen was normal.

At last follow-up at age of 3.5 years, the patient showed more prominent dysmorphism with coarse facies, macroglossia and hypertrichosis, as well as thoracic deformity (Fig. 1A). His length was 86 cm (z -4), weight 10 kg (z -4.2), body mass index 13.5 kg/m<sup>2</sup> and head circumference 48.5 cm (z -2.5). His psychomotor development had regressed further to a developmental age of approximately 2 months. He had developed slight knee joint contractures and received botulinum toxin injections and oral baclofen due to lower limb spasticity. Renewed analysis of urine glycosaminoglycans showed increased excretion (21 g/mol creatinine, ref 3–13 g/mol creatinine) and an abnormal pattern (65% chondroitin sulphate, 25% dermatan sulphate and 10% heparan sulphate). An X-ray showed coxa valga. Audiologic tests were inconclusive due to repeated ear infections. He suffered from severe gastroesophageal reflux (despite treatment with proton pump inhibitors), requiring exclusive feeding via a gastrostomy tube. Repeated heart examinations have been normal. Blood analyses have recurrently shown anemia (Hb 92-125 g/L, ref 115-135 g/L), but platelet counts have been normal ( $151-470 \times 10^9/L$ , ref  $150-350 \times 10^9/L$ ). Neutrophil counts have persisted at or below the lower normal range (absolute neutrophil counts  $0.3-4.3 \times 10^9/L$ , ref  $1.5-8.5 \times 10^9/L$ ). He has received oral iron supplementation due to microcytic anemia since the age of 1 year and 10 months. Antibiotic prophylaxis has been given and serious bacterial infections have been prevented.

Patient B is a girl born at 38+4 weeks of gestation after an uneventful pregnancy, to Turkish consanguineous, first-cousin parents (Family II; Fig. 2A), of which the mother had been diagnosed with autoimmune thrombocytopenia but the father reported healthy. Her birth weight was 3.4 kg (z-score +0.36 (WHO Multicentre Growth Reference Study Group 2006), length 51 cm (z +0.99) and head circumference 35 cm (z +0.95). Newborn screening indicated biotinidase deficiency (OMIM #253260), which was confirmed by enzymatic and molecular genetic analyses. Oral biotin supplementation was started immediately. In addition, blood counts showed thrombocytopenia (platelet count  $29 \times 10^9/L$ , ref  $84-478 \times 10^9/L$ ). This was interpreted as of alloimmune origin because of the mother's underlying condition, and recovered spontaneously. The patient had recurrent infections requiring antibiotic treatments, beginning on the second postnatal day. During infections, but also at asymptomatic encounters, mild to severe neutropenia was seen (absolute neutrophil counts  $0.2-1.5 \times 10^9/L$ , ref  $>1.5 \times 10^9/L$ ), while other white blood cells generally showed normal levels. Detection of anti-neutrophil antibodies raised the suspicion for primary

autoimmune neutropenia. Occasionally, neutrophil counts could be restored by administration of granulocyte colony stimulating factor (G-CSF). Furthermore, a normo- to microcytic anemia was repeatedly apparent, even after the period of physiologic anemia of infancy (Hb 74-110 g/L, ref >110 g/L; hematocrit 22.1-33.8 %, ref >33 %; MCV 69.9-80  $\mu\text{M}^3$ , ref >70  $\mu\text{M}^3$ ; reference values for 7–17 months of age according to (Kliegman, 2016). No laboratory indicators for iron deficiency were noted (soluble transferrin receptor was not assessed).

Psychomotor development was normal until 5 months of life, but reduced movements and vocalizations as well as feeding difficulties were noted at 7 months of age. At nine months, she could reach out, grasp, and make hand-to-mouth contact, but not turn around or crawl. Persisting newborn reflexes were seen, including the Galant reaction and the palmomental reflex. An MRI of the brain at this age showed global decreased brain volume with corpus callosum hypoplasia (not shown).

Progressive feeding difficulties and recurrent postprandial vomiting necessitated gastric tube feeding from 15 months of age. At 16 months, pyramidal signs, a striatal toe and severe muscular hypotonia were noted. A follow-up MRI at this age showed lack of progress of myelination (Fig. 1E), in comparison with previous MRI at 9 months of age. Dysmorphic stigmata with coarse facial features, a broad nasal bridge, and bushy eyebrows were obvious (Fig. 1B); both hands appeared broad and the phalanges shortened (Fig. 1B). Hepatomegaly was evident clinically and upon abdominal ultrasound. Markedly elevated levels of CSF protein (7138 mg/L, ref 0.09–0.33 mg/L) and slightly elevated CSF lactate (2.1 mmol/L, ref 1.0–2.0 mmol/L) were seen. CSF levels of 5-methyltetrahydrofolate (5-MTHF) were reduced (20.4 nmol/L, ref 64–182 nmol/L) and neopterin increased (99 nmol/L, ref 7–32 nmol/L).

Enzymatic assays for known LSDs (MPSs I, IIIA-C, IVB and VII, Sandhoff, Tay-Sachs,  $\alpha$ - and  $\beta$ -mannosidose, fucosidose and Krabbe's disease), VLCFA, urine organic acid, amino acids in CSF and plasma and a urine mucopolysaccharide screening test were normal or showed unspecific patterns. At 21 months of age, the patient showed lack of fixation and could not vocalize or communicate. No reaching, grasping or voluntary movements could be observed. X-rays of chest, skull, and hand revealed dysostosis multiplex (Fig. 1C-D). An EEG was normal and there was no history of epileptic seizures.

Latest available growth parameter were gathered at 1 year and 5 months: weight 7.6 kg (z-score -2.4), length 74 cm (z -2.1), body mass index 13.9 kg/m<sup>2</sup> (z -1.5) and head circumference 46 cm (z -0.1). At an age of 2 years and 3 months, the patient died following an episode of acute worsening and fever (details are unavailable).

## SUPPLEMENTARY REFERENCES

Chou, J.H., Roumiantsev, S. & Singh, R., 2020. PediTools Electronic Growth Chart Calculators: Applications in Clinical Care, Research, and Quality Improvement. *Journal of Medical Internet Research*, 22(1), pp.e16204–17.

Kliegman, R. M., Stanton, B., St. Geme, J., Schor, N. (2016) *Nelson's textbook of pediatrics (20th edition)*, Elsevier, Philadelphia.

WHO Multicentre Growth Reference Study Group (2006) Assessment of differences in linear growth among populations in the WHO Multicentre Growth Reference Study. *Acta paediatrica (Oslo, Norway). Supplement*, 450, pp.56–65.

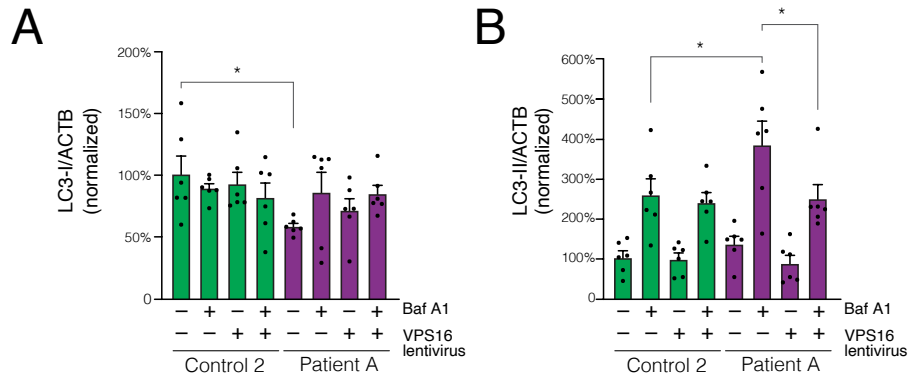

**Appendix Figure S1 (related to Fig 6C-D).** Quantifications of LC3-I (A) and LC3-II (B) normalized to  $\beta$ -actin (ACTB) and expressed as % of controls (n=6 biological replicates). Bar graphs represent data as mean  $\pm$ SEM. Statistical comparisons between the indicated groups by one-way ANOVA with Holm-Sidak's multiple comparisons tests. \*  $p < 0.05$ .

**Appendix Table S1 – Summary of statistical tests with exact n- and p-values.**

|                               |                                                                                                                 | n                                | comparison                                                                                            | Statistical test                                                                                            | p-value (adj)               |
|-------------------------------|-----------------------------------------------------------------------------------------------------------------|----------------------------------|-------------------------------------------------------------------------------------------------------|-------------------------------------------------------------------------------------------------------------|-----------------------------|
| Figure 3B<br>VPS16 Exon 7-9   | Ctrl 2<br>Pat A                                                                                                 | 3<br>3                           | Ctrl 2 vs Pat A                                                                                       | 2-tailed unpaired t-test                                                                                    | 0.0184                      |
| Figure 3B<br>VPS16 Exon 22-24 | Ctrl 2<br>Pat A                                                                                                 | 3<br>3                           | Ctrl 2 vs Pat A                                                                                       | 2-tailed unpaired t-test                                                                                    | 0.0005                      |
| Figure 3C                     | Ctrl 1<br>Ctrl 2<br>Pat A<br>Ctrl 2<br>Pat B                                                                    | 4<br>4<br>4<br>3<br>3            | Ctrl 1 vs Pat A<br>Ctrl 2 vs Pat A<br>Ctrl 2 vs Pat B                                                 | one-way ANOVA w Dunnett's test<br>one-way ANOVA w Dunnett's test<br>2-tailed unpaired t-test                | 0.0155<br>0.0075<br><0.0001 |
| Figure 3E                     | Ctrl 1<br>Ctrl 2<br>Pat A<br>Ctrl 2<br>Pat B                                                                    | 4<br>4<br>4<br>3<br>3            | Ctrl 1 vs Pat A<br>Ctrl 2 vs Pat A<br>Ctrl 2 vs Pat B                                                 | one-way ANOVA w Dunnett's test<br>one-way ANOVA w Dunnett's test<br>2-tailed unpaired t-test                | 0.0128<br>0.0065<br>0.0003  |
| Figure 3F                     | Ctrl 2<br>Pat A<br>Ctrl 2<br>Pat B                                                                              | 3<br>3<br>3<br>3                 | Ctrl 2 vs Pat A<br>Ctrl 2 vs Pat B                                                                    | 2-tailed unpaired t-test<br>2-tailed unpaired t-test                                                        | 0.0029<br>0.0002            |
| Figure 3G                     | Ctrl 2<br>Pat A                                                                                                 | 3<br>3                           | Ctrl 2 vs Pat A                                                                                       | 2-tailed unpaired t-test                                                                                    | 0.0027                      |
| Figure 3H<br>VPS33A           | Ctrl 1<br>Ctrl 2<br>Pat A                                                                                       | 3<br>3<br>3                      | Ctrl 1 vs Pat A<br>Ctrl 2 vs Pat A                                                                    | one-way ANOVA w Dunnett's test<br>one-way ANOVA w Dunnett's test                                            | 0.999<br>0.9727             |
| Figure 3H<br>VPS11            | Ctrl 1<br>Ctrl 2<br>Pat A                                                                                       | 3<br>3<br>3                      | Ctrl 1 vs Pat A<br>Ctrl 2 vs Pat A                                                                    | one-way ANOVA w Dunnett's test<br>one-way ANOVA w Dunnett's test                                            | 0.3415<br>0.6136            |
| Figure 3I<br>VPS16            | Ctrl<br>VPS16                                                                                                   | 3<br>3                           | Ctrl vs VPS16                                                                                         | 2-tailed unpaired t-test                                                                                    | <0.0001                     |
| Figure 3I<br>VPS33A           | Ctrl<br>VPS16                                                                                                   | 3<br>3                           | Ctrl vs VPS16                                                                                         | 2-tailed unpaired t-test                                                                                    | <0.0001                     |
| Figure 3I<br>VPS11            | Ctrl<br>VPS16                                                                                                   | 3<br>3                           | Ctrl vs VPS16                                                                                         | 2-tailed unpaired t-test                                                                                    | 0.0141                      |
| Figure 4B<br>Puncta number    | Ctrl 2 + Ctrl<br>Ctrl 2 + VPS16<br>Pat A + Ctrl<br>Pat A + VPS16                                                | 3<br>3<br>3<br>3                 | Ctrl 2 + Ctrl vs Pat A + Ctrl<br>Ctrl 2 + Ctrl vs Ctrl 2 + VPS16<br>Pat A + Ctrl vs Pat A + VPS16     | one-way ANOVA w Holm-Sidak's test<br>one-way ANOVA w Holm-Sidak's test<br>one-way ANOVA w Holm-Sidak's test | 0.9448<br>0.8471<br>>0.9999 |
| Figure 4B<br>Puncta intensity | Ctrl 2 + Ctrl<br>Ctrl 2 + VPS16<br>Pat A + Ctrl<br>Pat A + VPS16                                                | 3<br>3<br>3<br>3                 | Ctrl 2 + Ctrl vs Pat A + Ctrl<br>Ctrl 2 + Ctrl vs Ctrl 2 + VPS16<br>Pat A + Ctrl vs Pat A + VPS16     | one-way ANOVA w Holm-Sidak's test<br>one-way ANOVA w Holm-Sidak's test<br>one-way ANOVA w Holm-Sidak's test | 0.9111<br>0.9111<br>0.4749  |
| Figure 4D<br>Puncta number    | Ctrl 2 + Ctrl<br>Ctrl 2 + VPS16<br>Ctrl 2 + VPS16[N52K]<br>Pat A + Ctrl<br>Pat A + VPS16<br>Pat A + VPS16[N52K] | 29<br>28<br>30<br>29<br>30<br>30 | Ctrl 2 + Ctrl vs Pat A + Ctrl<br>Pat A + Ctrl vs Pat A + VPS16<br>Pat A + Ctrl vs Pat A + VPS16[N52K] | one-way ANOVA w Holm-Sidak's test<br>one-way ANOVA w Holm-Sidak's test<br>one-way ANOVA w Holm-Sidak's test | 0.079<br>0.0086<br><0.0001  |
| Figure 4D<br>Puncta intensity | Ctrl 2 + Ctrl<br>Ctrl 2 + VPS16<br>Ctrl 2 + VPS16[N52K]<br>Pat A + Ctrl<br>Pat A + VPS16<br>Pat A + VPS16[N52K] | 29<br>28<br>30<br>29<br>30<br>30 | Ctrl 2 + Ctrl vs Pat A + Ctrl<br>Pat A + Ctrl vs Pat A + VPS16<br>Pat A + Ctrl vs Pat A + VPS16[N52K] | one-way ANOVA w Holm-Sidak's test<br>one-way ANOVA w Holm-Sidak's test<br>one-way ANOVA w Holm-Sidak's test | <0.0001<br>0.0093<br>0.0093 |
| Figure 4F                     | Ctrl 2 + Ctrl<br>Ctrl 2 + VPS16<br>Pat A + Ctrl<br>Pat A + VPS16                                                | 9<br>9<br>9<br>9                 | Ctrl 2 + Ctrl vs Pat A + Ctrl<br>Ctrl 2 + Ctrl vs Ctrl 2 + VPS16<br>Pat A + Ctrl vs Pat A + VPS16     | one-way ANOVA w Holm-Sidak's test<br>one-way ANOVA w Holm-Sidak's test<br>one-way ANOVA w Holm-Sidak's test | 0.0334<br>0.799<br>0.0334   |
| Figure 4G                     | Ctrl 2 + Ctrl<br>Ctrl 2 + VPS16<br>Pat A + Ctrl<br>Pat A + VPS16                                                | 10<br>10<br>10<br>10             | Ctrl 2 + Ctrl vs Pat A + Ctrl<br>Pat A + Ctrl vs Pat A + VPS16                                        | one-way ANOVA w Holm-Sidak's test<br>one-way ANOVA w Holm-Sidak's test                                      | 0.0039<br>0.0248            |
| Figure 4H                     | Ctrl 2 + Ctrl<br>Ctrl 2 + VPS16<br>Pat A + Ctrl<br>Pat A + VPS16                                                | 10<br>10<br>10<br>10             | Ctrl 2 + Ctrl vs Pat A + Ctrl<br>Pat A + Ctrl vs Pat A + VPS16                                        | one-way ANOVA w Holm-Sidak's test<br>one-way ANOVA w Holm-Sidak's test                                      | 0.0037<br>0.0655            |
| Figure 5B<br>Puncta number    | Ctrl 2 + Ctrl<br>Ctrl 2 + VPS16<br>Pat A + Ctrl<br>Pat A + VPS16                                                | 3<br>3<br>3<br>3                 | Ctrl 2 + Ctrl vs Pat A + Ctrl<br>Ctrl 2 + Ctrl vs Ctrl 2 + VPS16<br>Pat A + Ctrl vs Pat A + VPS16     | one-way ANOVA w Holm-Sidak's test<br>one-way ANOVA w Holm-Sidak's test<br>one-way ANOVA w Holm-Sidak's test | 0.0159<br>0.809<br>0.0159   |
| Figure 5B<br>Puncta intensity | Ctrl 2 + Ctrl<br>Ctrl 2 + VPS16<br>Pat A + Ctrl<br>Pat A + VPS16                                                | 3<br>3<br>3<br>3                 | Ctrl 2 + Ctrl vs Pat A + Ctrl<br>Ctrl 2 + Ctrl vs Ctrl 2 + VPS16<br>Pat A + Ctrl vs Pat A + VPS16     | one-way ANOVA w Holm-Sidak's test<br>one-way ANOVA w Holm-Sidak's test<br>one-way ANOVA w Holm-Sidak's test | 0.0019<br>0.5012<br>0.0015  |

|                                     |                                                                                                                                                                          |                                      |                                                                                                                                                                                                                                              |                                                                                                                                                                                                                            |                                                          |
|-------------------------------------|--------------------------------------------------------------------------------------------------------------------------------------------------------------------------|--------------------------------------|----------------------------------------------------------------------------------------------------------------------------------------------------------------------------------------------------------------------------------------------|----------------------------------------------------------------------------------------------------------------------------------------------------------------------------------------------------------------------------|----------------------------------------------------------|
| Figure 5C                           | Ctrl 2<br>Pat A                                                                                                                                                          | 3<br>3                               |                                                                                                                                                                                                                                              | <i>no statistical comparison was done</i>                                                                                                                                                                                  |                                                          |
| Figure 5D                           | Ctrl 2<br>Pat A                                                                                                                                                          | 3<br>3                               |                                                                                                                                                                                                                                              | <i>no statistical comparison was done</i>                                                                                                                                                                                  |                                                          |
| Figure 5E                           | Ctrl 2<br>Pat A                                                                                                                                                          | 3<br>3                               | Ctrl 2 vs Pat A                                                                                                                                                                                                                              | 2-tailed unpaired t-test                                                                                                                                                                                                   | 0.0677                                                   |
| Figure 6B                           | Ctrl 2 + Ctrl<br>Ctrl 2 + Ctrl, starv<br>Ctrl 2 + VPS16<br>Ctrl 2 + VPS16, starv<br>Pat A + Ctrl<br>Pat A + Ctrl, starv<br>Pat A + VPS16<br>Pat A + VPS16, starv         | 3<br>3<br>3<br>3<br>3<br>3<br>3<br>3 | Ctrl 2 + Ctrl vs Pat A + Ctrl<br>Ctrl 2 + Ctrl, starv vs Pat A + Ctrl, starv<br>Ctrl 2 + Ctrl vs Ctrl 2 + Ctrl, starv<br>Pat A + Ctrl vs Pat A + Ctrl, starv<br>Pat A + Ctrl vs Pat A + VPS16<br>Pat A + Ctrl, starv vs Pat A + VPS16, starv | one-way ANOVA w Holm-Sidak's test<br>one-way ANOVA w Holm-Sidak's test | 0.6905<br>0.1538<br>0.6905<br>0.6905<br>0.4101<br>0.3498 |
| Figure 6D                           | Ctrl 2 + Ctrl<br>Ctrl 2 + Ctrl + Baf A1<br>Ctrl 2 + VPS16<br>Ctrl 2 + VPS16 + Baf A1<br>Pat A + Ctrl<br>Pat A + Ctrl + Baf A1<br>Pat A + VPS16<br>Pat A + VPS16 + Baf A1 | 6<br>6<br>6<br>6<br>6<br>6<br>6<br>6 | Ctrl 2 + Ctrl vs Pat A + Ctrl<br>Ctrl 2 + Ctrl + Baf A1 vs Pat A + Ctrl + Baf A1<br>Pat A + Ctrl vs Pat A + VPS16<br>Pat A + Ctrl + Baf A1 vs Pat A + VPS16 + Baf A1                                                                         | one-way ANOVA w Holm-Sidak's test<br>one-way ANOVA w Holm-Sidak's test<br>one-way ANOVA w Holm-Sidak's test<br>one-way ANOVA w Holm-Sidak's test                                                                           | 0.0149<br>0.0512<br>0.0002<br>0.0004                     |
| Figure 6E                           | Ctrl 2 + Ctrl<br>Ctrl 2 + VPS16<br>Pat A + Ctrl<br>Pat A + VPS16                                                                                                         | 6<br>6<br>6<br>6                     | Ctrl 2 + Ctrl vs Pat A + Ctrl<br>Ctrl 2 + VPS16 vs Pat A + VPS16<br>Pat A + Ctrl vs Pat A + VPS16                                                                                                                                            | one-way ANOVA w Holm-Sidak's test<br>one-way ANOVA w Holm-Sidak's test<br>one-way ANOVA w Holm-Sidak's test                                                                                                                | 0.9473<br>0.7201<br>0.7201                               |
| Figure 6G                           | Ctrl 2<br>Ctrl 2, starv<br>Pat A<br>Pat A, starv                                                                                                                         | 78<br>61<br>113<br>57                | Ctrl 2 vs Pat A<br>Ctrl 2 vs Ctrl 2, starv<br>Pat A vs Pat A, starv                                                                                                                                                                          | one-way ANOVA w Holm-Sidak's test<br>one-way ANOVA w Holm-Sidak's test<br>one-way ANOVA w Holm-Sidak's test                                                                                                                | <0.0001<br>0.0339<br>0.0405                              |
| Figure 6H                           | Ctrl 2<br>Ctrl 2, starv<br>Pat A<br>Pat A, starv                                                                                                                         | 78<br>59<br>113<br>50                | Ctrl 2 vs Pat A<br>Ctrl 2 vs Ctrl 2, starv<br>Pat A vs Pat A, starv<br>Ctrl 2, starv vs Pat A, starv                                                                                                                                         | one-way ANOVA w Holm-Sidak's test<br>one-way ANOVA w Holm-Sidak's test<br>one-way ANOVA w Holm-Sidak's test<br>one-way ANOVA w Holm-Sidak's test                                                                           | <0.0001<br>0.1502<br>0.0145<br><0.0001                   |
| Figure 7D                           | Ctrl<br>vps16                                                                                                                                                            | 6<br>11                              | Ctrl vs vps16                                                                                                                                                                                                                                | Mann-Whitney U test                                                                                                                                                                                                        | 0.0019                                                   |
| Figure 8B                           | Ctrl, 3dpf<br>vps16, 3dpf<br><br>Ctrl, 5 dpf<br>vps16, 5 dpf                                                                                                             | 6<br>6<br><br>3<br>12                | Ctrl, 3dpf vs vps16, 3dpf<br><br>Ctrl, 5 dpf vs vps16, 5 dpf                                                                                                                                                                                 | Mann-Whitney U test<br><br>Mann-Whitney U test                                                                                                                                                                             | 0.3939<br><br>0.0044                                     |
| Figure 8E                           | Ctrl<br>vps16                                                                                                                                                            | 28<br>14                             | Ctrl vs vps16                                                                                                                                                                                                                                | Mann-Whitney U test                                                                                                                                                                                                        | 0.0001                                                   |
| Figure EV3B<br>VPS16                | Ctrl 2; 0 min<br>Pat A; 0 min<br>Ctrl 2; 30 min<br>Pat A; 30 min<br>Ctrl 2; 120 min<br>Pat A; 120 min                                                                    | 3<br>3<br>3<br>3<br>3<br>3           |                                                                                                                                                                                                                                              | <i>no statistical comparison was done</i>                                                                                                                                                                                  |                                                          |
| Figure EV3B<br>VPS33A               | Ctrl 2; 0 min<br>Pat A; 0 min<br>Ctrl 2; 30 min<br>Pat A; 30 min<br>Ctrl 2; 120 min<br>Pat A; 120 min                                                                    | 2<br>2<br>2<br>2<br>2<br>2           |                                                                                                                                                                                                                                              | <i>no statistical comparison was done</i>                                                                                                                                                                                  |                                                          |
| Figure EV3D<br>VPS16                | Ctrl<br>VPS16                                                                                                                                                            | 3<br>3                               | Ctrl vs VPS16                                                                                                                                                                                                                                | 2-tailed unpaired t-test                                                                                                                                                                                                   | <0.0001                                                  |
| Figure EV3D<br>VPS33A               | Ctrl<br>VPS16                                                                                                                                                            | 3<br>3                               | Ctrl vs VPS16                                                                                                                                                                                                                                | 2-tailed unpaired t-test                                                                                                                                                                                                   | <0.0001                                                  |
| Figure EV4A                         | Ctrl 2<br>Pat A                                                                                                                                                          | 3<br>3                               | Ctrl 2 vs Pat A                                                                                                                                                                                                                              | 2-tailed unpaired t-test                                                                                                                                                                                                   | 0.0023                                                   |
| Figure EV4B                         | Ctrl 2 + Ctrl<br>Ctrl 2 + Ctrl, starv<br>Ctrl 2 + VPS16<br>Ctrl 2 + VPS16, starv<br>Pat A + Ctrl<br>Pat A + Ctrl, starv<br>Pat A + VPS16<br>Pat A + VPS16, starv         | 3<br>3<br>3<br>3<br>3<br>3<br>3<br>3 |                                                                                                                                                                                                                                              | <i>no statistical comparison was done</i>                                                                                                                                                                                  |                                                          |
| Figure EV4D                         | Ctrl 2<br>Pat A                                                                                                                                                          | 10<br>10                             |                                                                                                                                                                                                                                              | <i>no statistical comparison was done</i>                                                                                                                                                                                  |                                                          |
| Figure EV4E<br><i>Puncta number</i> | Ctrl 2 + Ctrl<br>Ctrl 2 + VPS16<br>Pat A + Ctrl<br>Pat A + VPS16                                                                                                         | 8<br>7<br>8<br>6                     | Ctrl 2 + Ctrl vs Pat A + Ctrl<br>Ctrl 2 + Ctrl vs Ctrl 2 + VPS16<br>Pat A + Ctrl vs Pat A + VPS16                                                                                                                                            | one-way ANOVA w Holm-Sidak's test<br>one-way ANOVA w Holm-Sidak's test<br>one-way ANOVA w Holm-Sidak's test                                                                                                                | 0.4238<br>0.1783<br>0.7075                               |



|                        |                         |   |                                                 |                                   |                                           |
|------------------------|-------------------------|---|-------------------------------------------------|-----------------------------------|-------------------------------------------|
| Figure EV4E            | Ctrl 2 + Ctrl           | 8 |                                                 |                                   |                                           |
| Puncta intensity       | Ctrl 2 + VPS16          | 7 |                                                 |                                   |                                           |
|                        | Pat A + Ctrl            | 8 |                                                 |                                   |                                           |
|                        | Pat A + VPS16           | 6 |                                                 |                                   | <i>no statistical comparison was done</i> |
| Appendix Figure S1A    | Ctrl 2 + Ctrl           | 6 | Ctrl 2 + Ctrl vs Pat A + Ctrl                   | one-way ANOVA w Holm-Sidak's test | 0.0262                                    |
|                        | Ctrl 2 + Ctrl + Baf A1  | 6 | Ctrl 2 + Ctrl + Baf A1 vs Pat A + Ctrl + Baf A1 | one-way ANOVA w Holm-Sidak's test | 0.9692                                    |
|                        | Ctrl 2 + VPS16          | 6 |                                                 |                                   |                                           |
|                        | Ctrl 2 + VPS16 + Baf A1 | 6 |                                                 |                                   |                                           |
|                        | Pat A + Ctrl            | 6 | Pat A + Ctrl vs Pat A + VPS16                   | one-way ANOVA w Holm-Sidak's test | 0.7683                                    |
|                        | Pat A + Ctrl + Baf A1   | 6 | Pat A + Ctrl + Baf A1 vs Pat A + VPS16 + Baf A1 | one-way ANOVA w Holm-Sidak's test | 0.9692                                    |
|                        | Pat A + VPS16           | 6 |                                                 |                                   |                                           |
|                        | Pat A + VPS16 + Baf A1  | 6 |                                                 |                                   |                                           |
| Appendix Figure S1B    | Ctrl 2 + Ctrl           | 6 | Ctrl 2 + Ctrl vs Pat A + Ctrl                   | one-way ANOVA w Holm-Sidak's test | 0.502                                     |
|                        | Ctrl 2 + Ctrl + Baf A1  | 6 | Ctrl 2 + Ctrl + Baf A1 vs Pat A + Ctrl + Baf A1 | one-way ANOVA w Holm-Sidak's test | 0.0258                                    |
|                        | Ctrl 2 + VPS16          | 6 |                                                 |                                   |                                           |
|                        | Ctrl 2 + VPS16 + Baf A1 | 6 |                                                 |                                   |                                           |
|                        | Pat A + Ctrl            | 6 | Pat A + Ctrl vs Pat A + VPS16                   | one-way ANOVA w Holm-Sidak's test | 0.502                                     |
|                        | Pat A + Ctrl + Baf A1   | 6 | Pat A + Ctrl + Baf A1 vs Pat A + VPS16 + Baf A1 | one-way ANOVA w Holm-Sidak's test | 0.0197                                    |
|                        | Pat A + VPS16           | 6 |                                                 |                                   |                                           |
| Pat A + VPS16 + Baf A1 | 6                       |   |                                                 |                                   |                                           |
